# Supplementary material for: Fasting Glucose Variability as a Risk Indicator for End-Stage Kidney Disease in Patients with Diabetes: A Nationwide Population-Based Study
Source: MDPI journal article supplement (doi:10.3390/jcm10245948), 2021-12-18
Supplement: s1 [file s1]

**Supplementary Table S1.** Hazard ratios (HRs) and 95% confidence intervals (CIs) for the incidence of end-stage kidney disease by deciles of fasting glucose variability.

|                    | Events (n) | Follow-up duration<br>(Person-years) | Incidence rate<br>(per 1000<br>person-years) | Multivariate-adjusted HR<br>(95% CI) |
|--------------------|------------|--------------------------------------|----------------------------------------------|--------------------------------------|
| D1 (N = 77,719)    | 549        | 589,756.6                            | 0.93                                         | 1 (Ref.)                             |
| D2 (N = 77,720)    | 562        | 591,905.4                            | 0.95                                         | 1.04 (0.92–1.17)                     |
| D3 (N = 77,718)    | 577        | 593,276.2                            | 0.97                                         | 1.01 (0.9–1.14)                      |
| D4 (N = 77,716)    | 584        | 593,566.6                            | 0.98                                         | 1.0 (0.9–1.13)                       |
| D5 (N = 77,720)    | 627        | 593,598.4                            | 1.06                                         | 1.03 (0.91–1.15)                     |
| D6 (N = 77,719)    | 663        | 593,304.4                            | 1.12                                         | 1.06 (0.94–1.18)                     |
| D7 (N = 77,723)    | 705        | 593,048.9                            | 1.19                                         | 1.06 (0.95–1.19)                     |
| D8 (N = 77,719)    | 767        | 592,077.8                            | 1.30                                         | 1.1 (0.99–1.23)                      |
| D9 (N = 77,719)    | 925        | 589,935.8                            | 1.57                                         | 1.22 (1.09–1.35)                     |
| D10 (N = 77,719)   | 1,331      | 582,716.8                            | 2.28                                         | 1.41 (1.28–1.56)                     |
| <i>P</i> for trend |            |                                      |                                              | <0.001                               |

a D1:0–7.6; D2:7.7–11.1; D3:11.2–14.2; D4:14.3–17.3; D5:17.4–20.5; D6:20.6–24.2; D7:23.3–28.6; D8:28.7–34.3; D9:34.4–43.1; D10: ≥43.2.

Adjusted for age, sex, body mass index, smoking, alcohol drinking, exercise, presence of dyslipidemia, hypertension, chronic kidney disease, low-income status, duration of diabetes as continuous variable, the number of classes of oral glucose-lowering medicine, presence of prescription history of insulin, mean fasting, and the number of exams.

**Supplementary Table S2.** Hazard ratios (HRs) and 95% confidence intervals (CIs) for the incidence of end-stage kidney disease by quartiles of fasting glucose variability, assessed by standard deviation, coefficient of variation, and average real variability.

|                                     | Events (n) | Incidence rate<br>(per 1000<br>person-years) | Multivariate-adjusted HR (95% CI) |
|-------------------------------------|------------|----------------------------------------------|-----------------------------------|
| <b>FG SD Quartiles<sup>a</sup></b>  |            |                                              |                                   |
| Q1 (n = 193,996)                    | 1,115      | 0.76                                         | 1 (Ref.)                          |
| Q2 (n = 194,695)                    | 1,227      | 0.82                                         | 0.92 (0.85–0.99)                  |
| Q3 (n = 194,206)                    | 1,439      | 0.97                                         | 0.89 (0.82–0.96)                  |
| Q4 (n = 194,295)                    | 3,509      | 2.40                                         | 1.17 (1.08–1.26)                  |
| <b>FG CV Quartiles<sup>b</sup></b>  |            |                                              |                                   |
| Q1 (n = 194,297)                    | 1,215      | 0.82                                         | 1 (Ref.)                          |
| Q2 (n = 194,298)                    | 1,369      | 0.92                                         | 0.99 (0.92–1.08)                  |
| Q3 (n = 194,299)                    | 1,631      | 1.10                                         | 0.99 (0.91–1.06)                  |
| Q4 (n = 194,298)                    | 3,075      | 2.10                                         | 1.22 (1.14–1.31)                  |
| <b>FG ARV Quartiles<sup>c</sup></b> |            |                                              |                                   |
| Q1 (n = 193,366)                    | 1,073      | 0.73                                         | 1 (Ref.)                          |
| Q2 (n = 192,075)                    | 1,153      | 0.78                                         | 0.92 (0.85–1.01)                  |
| Q3 (n = 198,086)                    | 1,537      | 1.02                                         | 0.94 (0.87–1.02)                  |
| Q4 (n = 193,665)                    | 3,527      | 2.42                                         | 1.19 (1.1–1.29)                   |

<sup>a</sup> Q1: 0–10.7; Q2: 10.8–18.8; Q3: 18.9–31.8; Q4: ≥31.9.

<sup>b</sup> Q1: 0–9.4; Q2: 9.5–15.6; Q3: 15.7–24.3; Q4: ≥24.4.

<sup>c</sup> Q1: 0–12.4; Q2: 12.5–21.4; Q3: 21.5–37.2; Q4: ≥37.3.

Adjusted for age, sex, body mass index, smoking, alcohol drinking, exercise, presence of dyslipidemia, hypertension, chronic kidney disease, low-income status, duration of diabetes as continuous variable, the number of classes of oral glucose-lowering medicine, presence of prescription history of insulin, mean fasting, and the number of exams.

**Supplementary Table S3.** Hazard ratios and 95% confidence intervals for the incidence of end-stage of renal disease according to baseline fasting glucose concentration

|                             | Events<br>(n) | Follow-up<br>duration<br>(person-<br>years) | Incidence<br>rate<br>(per 1000<br>person-<br>years) | Age- and sex-<br>adjusted<br>HR (95% CI) | Multivariate-adjusted<br>HR (95% CI) |                  |
|-----------------------------|---------------|---------------------------------------------|-----------------------------------------------------|------------------------------------------|--------------------------------------|------------------|
|                             |               |                                             |                                                     |                                          | Model 1                              | Model 2          |
| End-stage of renal disease  |               |                                             |                                                     |                                          |                                      |                  |
| <80 mg/dL (n = 20,822)      | 425           | 153871.8                                    | 2.76                                                | 2.39 (2.15–2.67)                         | 2.07 (1.86–2.31)                     | 1.48 (1.32–1.65) |
| 80-99 mg/dL (n = 122,570)   | 1221          | 921938.2                                    | 1.32                                                | 1.17 (1.08–1.27)                         | 1.16 (1.07–1.25)                     | 1.24 (1.15–1.34) |
| 100-119 mg/dL (n = 158,072) | 1368          | 1199716.1                                   | 1.14                                                | 1(Ref.)                                  | 1(Ref.)                              | 1(Ref.)          |
| 120-139 mg/dL (n = 216,789) | 1231          | 1664240.4                                   | 0.74                                                | 0.69 (0.64–0.74)                         | 0.75 (0.7–0.81)                      | 0.77 (0.71–0.83) |
| 140-159 mg/dL (n = 116,220) | 823           | 891204.3                                    | 0.92                                                | 0.87 (0.79–0.95)                         | 0.95 (0.87–1.03)                     | 0.82 (0.75–0.89) |
| 160-179 mg/dL (n = 55,151)  | 522           | 420842.0                                    | 1.24                                                | 1.18 (1.06–1.3)                          | 1.27 (1.15–1.41)                     | 0.93 (0.84–1.03) |
| ≥180 mg/dL (n = 87,568)     | 1700          | 661374.1                                    | 2.57                                                | 2.56 (2.38–2.75)                         | 2.65 (2.47–2.85)                     | 1.64 (1.52–1.77) |

Model 1 is adjusted for age, sex, body mass index, smoking, alcohol drinking, exercise, presence of chronic kidney disease, dyslipidemia, and hypertension, and low-income status.

Model 2 is the same as model 1, plus an adjustment for duration of diabetes as continuous variable, the number of classes of oral glucose-lowering medicine, the presence of prescription history of insulin, and the number of exams.

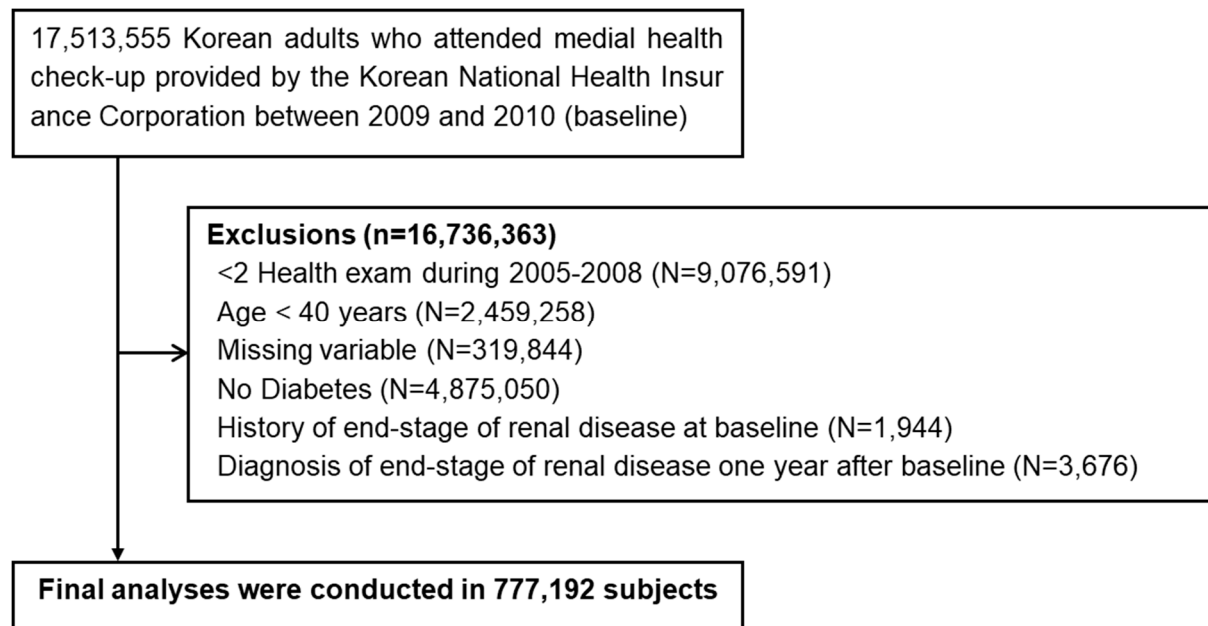

**Supplementary Figure S1.** Selection of study subjects.

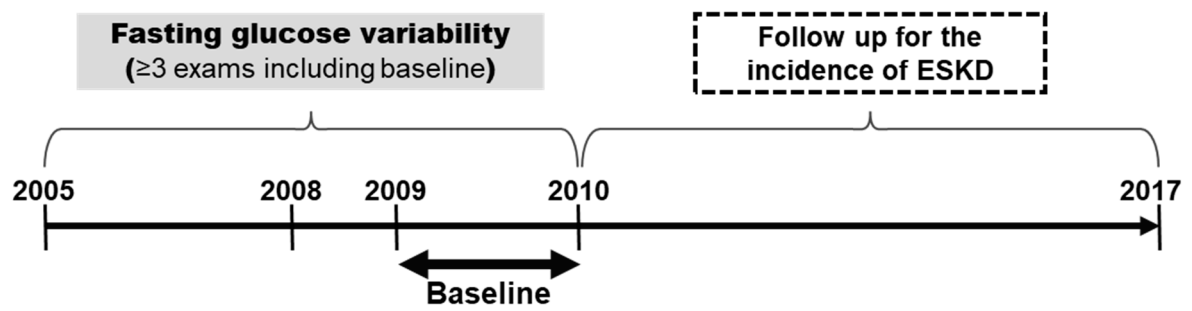

**Supplementary Figure S2.** Study design showing the period estimating glucose variability and the risk of incident end-stage kidney disease (ESKD).
